# Supplementary material for: Map-like navigation from distances exceeding routine movements in the three-striped poison frog (Ameerega trivittata)
Source: Oxford University Press journal article supplement (doi:10.1242/jeb.169714), 2017-01-01
Supplement: jeb169714supp.pdf [file jeb169714supp.pdf]

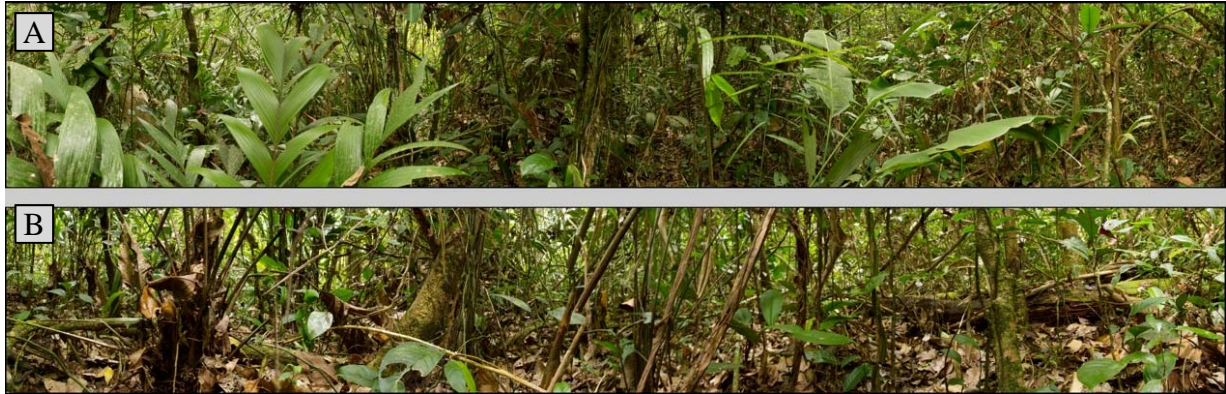

Figure S1. Photographic panorama-view from one of the successful homing trajectory points showing the habitat structure. A) Photograph taken from higher-end perching height of a calling *A. trivittata* (approximately 1 m). B) Photograph taken from a usual perching height of a moving *A. trivittata* (approximately 0.3 m).

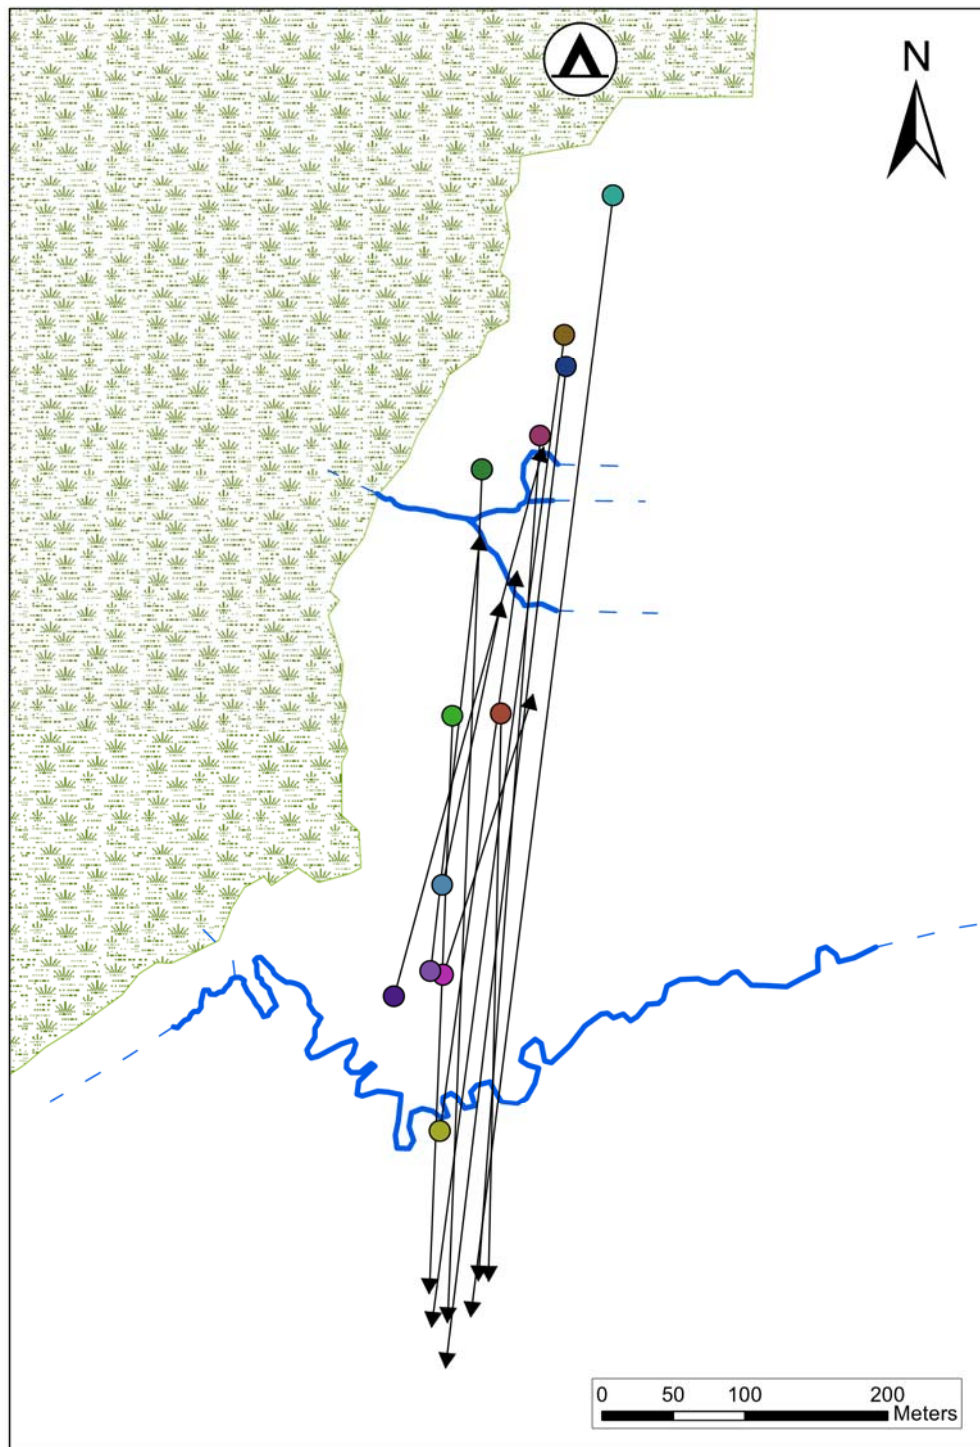

Figure S2. Map of the study area showing the territories (colored circles) and the release sites (arrowheads) of 12 translocated males. The area filled with “tussock” represents the pastureland bordering the study area. Blue lines represent the creeks. Camp symbol represents the field station.



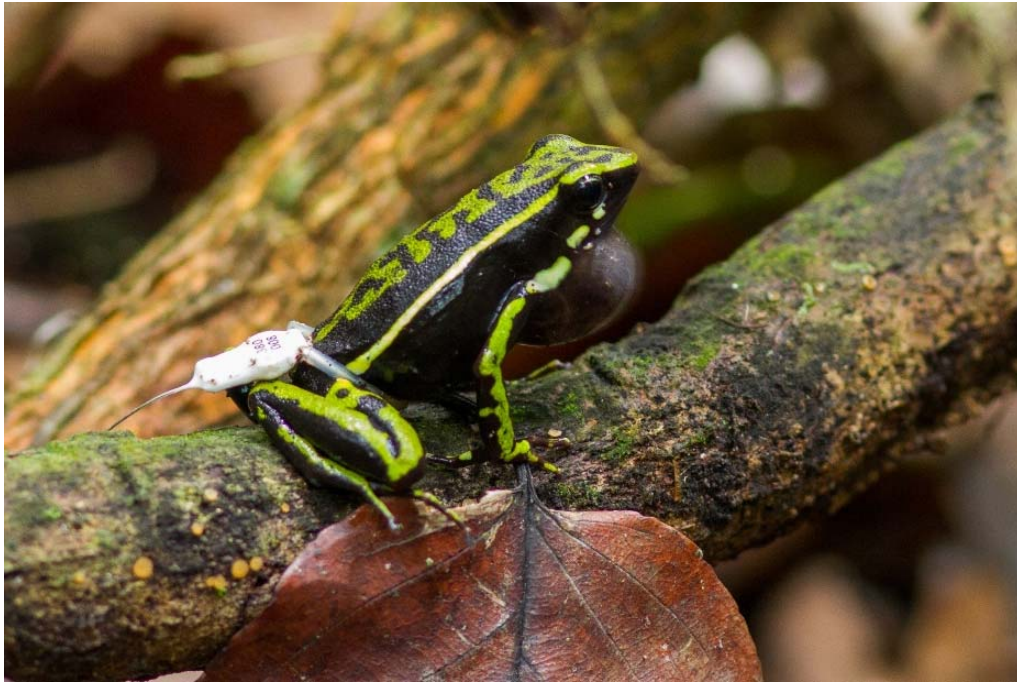

Figure S3. Photograph of a male *A. trivittata* calling in his territory while wearing a miniature radio transmitter attached with a waistband made from fine silicone tubing.

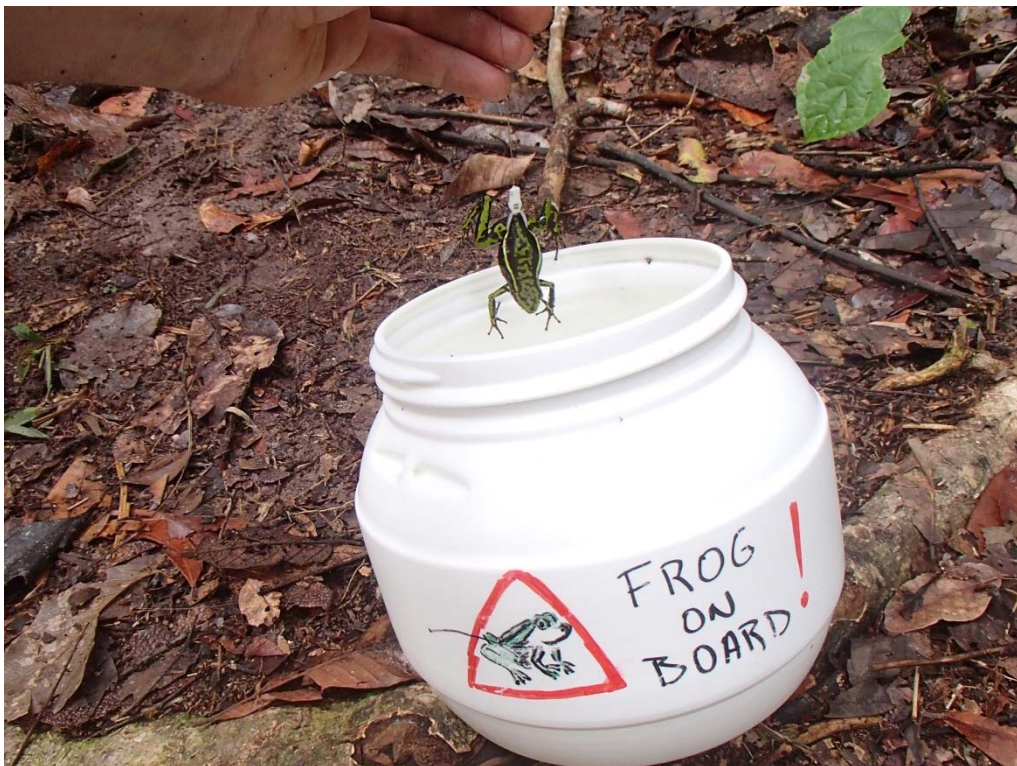

Figure S4. Photograph of a male *A. trivittata* being placed in an airtight opaque container used for transporting frogs between the capture and the release site.

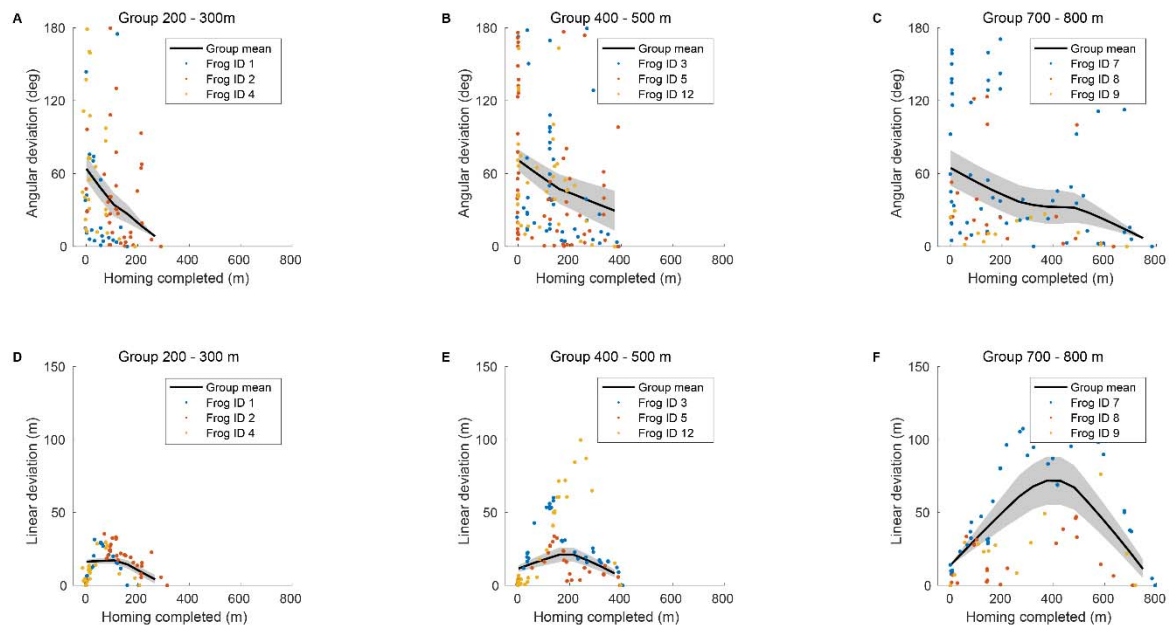

Figure S5. Homing precision as a function of homing path completed. Each plot shows three frogs homing from 200 – 300 m, 400 – 500 m, and 700 – 800 m back to their territory (total  $n = 9$ ), where the far-left corresponds to the release site and far-right to the arrival at the home territory. Colored dots represent tracking points along the trajectory and each line represents a smoothed group mean. The shading represents the respective standard errors of each mean. The group mean and standard error were calculated using 50 m averaging bins and smoothed with a 10-point sliding window. The homing precision measured as A) B) C) absolute angular deviation from the ideal angle (i.e., home direction) and D) E) F) linear deviation from a straight-line path from the release site to the home territory.

| Frog ID                    | Homing success | Transloc. dist. [m] | Homing dur. [h] | Mean speed [m/h] | Max. speed [m/h] | Linear deviation [m] | Abs. ang. deviation [deg] | SC  | Orient. 5-20 m [deg] | Orient. 20-50 m [deg] |
|----------------------------|----------------|---------------------|-----------------|------------------|------------------|----------------------|---------------------------|-----|----------------------|-----------------------|
| <b>1</b> (Señor Estanque)  | +              | 200                 | 120.0           | 4.3              | 11.4             | 14.6                 | 35.5                      | 0.9 | 287.2                | 331.1                 |
| <b>2</b> (Lianida)         | +              | 300                 | 137.8           | 5.5              | 31.7             | 19.5                 | 40.0                      | 0.8 | 311.8                | NA                    |
| <b>3</b> (Phoneutria)      | +              | 400                 | 190.9           | 6.0              | 32.1             | 31.3                 | 54.8                      | 0.8 | 172.2                | 28.4                  |
| <b>4</b> (Mr. Bullet Ant)  | +              | 200                 | 94.8            | 7.6              | 30.1             | 11.7                 | 67.7                      | 0.6 | 221.3                | 19.3                  |
| <b>5</b> (Ricky Martin)    | +              | 400                 | 215.8           | 4.4              | 38.3             | 9.0                  | 55.8                      | 0.8 | 70.3                 | NA                    |
| <b>6</b> (Drunken Sailor)  | -              | 600                 | NA              | 10.5             | 37.7             | 70.3                 | 75.6                      | 0.2 | 5.7                  | 206.2                 |
| <b>7</b> (Herr Humboldt)   | +              | 800                 | 264.8           | 8.8              | 38.1             | 52.1                 | 63.3                      | 0.8 | 297.6                | 327.9                 |
| <b>8</b> (La Tigresa)      | +              | 700                 | 89.4            | 19.4             | 55.4             | 18.8                 | 46.5                      | 0.9 | 336.0                | 3.2                   |
| <b>9</b> (Speedy Gonzales) | +              | 700                 | 45.2            | 39.9             | 64.2             | 30.3                 | 13.5                      | 0.9 | 335.6                | NA                    |
| <b>10</b> (Mick Jagger)    | +              | 400                 | NA              | 6.5              | 40.5             | NA                   | NA                        | NA  | 318.2                | 281.2                 |
| <b>11</b> (Adam)           | -              | 600                 | NA              | 8.7              | 39.6             | 12.0                 | 57.7                      | 0.2 | 151.0                | NA                    |
| <b>12</b> (Delfin)         | +              | 400                 | 191.2           | 6.4              | 23.5             | 28.6                 | 55.9                      | 0.7 | 277.4                | 3.2                   |

Table S1: Summary table of all measured variables for each translocated frog: homing success (“+” stands for successful homing), translocation distance, homing duration, mean and maximum speed, mean linear deviation from straight line trajectory to home, mean absolute angular deviation from homeward orientation, straightness coefficient, initial orientation bearings within 5 – 20 m and 20 – 50 m from the release site.

\* Transmitter malfunction. Frog recaptured home but full trajectory not available.

## Dataset 1

[Click here to Download Dataset 1](#)

## Dataset 2

[Click here to Download Dataset 2](#)
